# Supplementary material for: Prioritization of causal genes for coronary artery disease based on cumulative evidence from experimental and in silico studies
Source: PubMed Central journal article supplement (PMC7320185; doi:10.1038/s41598-020-67001-w), 2020-06-26

## **Prioritization of causal genes for coronary artery disease based on cumulative evidence from experimental and *in silico* studies**

Alexandra S. Shadrina, Tatiana I. Shashkova, Anna A. Torgasheva, Sodbo Z. Sharapov, Lucija Klarić, Eugene D. Pakhomov, Dmitry G. Alexeev, James F. Wilson, Yakov A. Tsepilov, Peter K. Joshi, Yurii S. Aulchenko

# Supplementary Figures

**Supplementary Figure S1.** A scheme depicting selection of CAD-associated loci for SMR/HEIDI analysis.

**Supplementary Figure S2.** A pipeline of extracting data from the previous studies on the genes potentially associated with CAD.

**Supplementary Figure S1.** A scheme depicting selection of CAD-associated loci for SMR/HEIDI analysis.

Howson et al., all ancestry (2017)

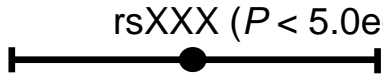

61 loci

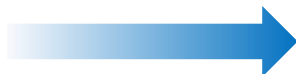

Howson et al., European ancestry (2017)

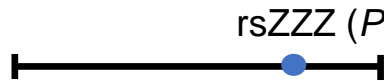

50 loci

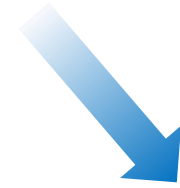

matching

Nikpay et al., all ancestry (2015)

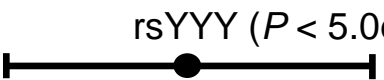

35 loci

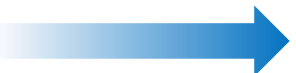

CARDIoGRAM, European ancestry (2011)

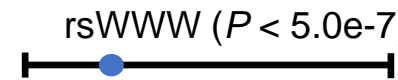

17 loci

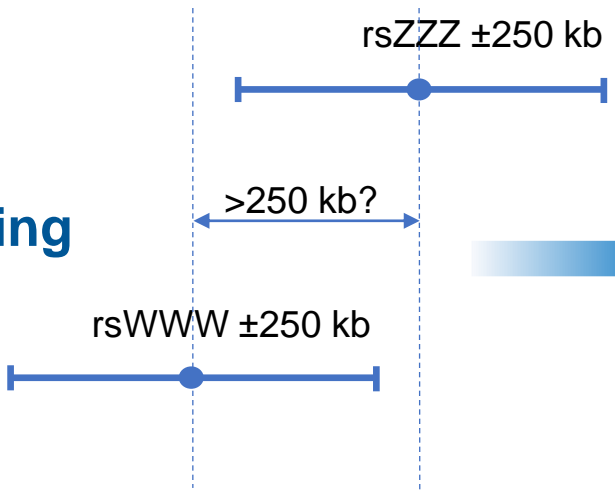

loci in the analysis

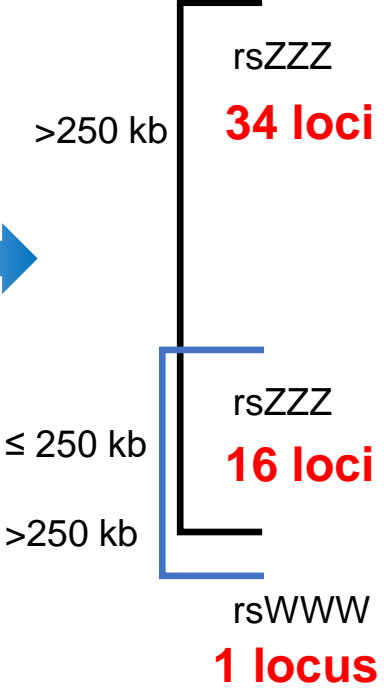

**Supplementary Figure S2.** A pipeline of extracting data from the previous studies on the genes potentially associated with CAD.

**Bioinformatics studies**

Brænne et al., 2015  
Lempiäinen et al., 2018  
van der Harst et al., 2018  
*What are SNPs prioritized with the genes in these studies?*

the NCBI SNP database  
*What are chromosome positions of the prioritized SNPs?*

*Is the prioritized SNP located in the studied locus?*

**If yes**

attribute the gene prioritized with this SNP to the locus

Svishcheva et al., 2019  
*What genes were revealed in the gene-based analysis?*

*Is the gene located\* in the locus?*  
*(\*gene sequence at least partially overlaps with the locus)*

**If yes**

attribute the gene to the locus

**Literature search (evidence from experimental studies)**

the NCBI Gene database  
*What genes are located\* in the locus?*  
*(\*gene sequence at least partially overlaps with the locus)*

Pubmed, Google Scholar, OMIM  
*Does evidence from experimental studies suggest the role of the gene in CAD?*

**If yes**

attribute the gene to the locus

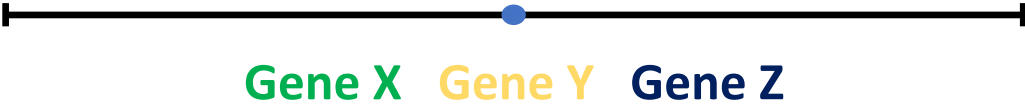

Supplement: 41598_2020_67001_MOESM1_ESM.pdf [file 41598_2020_67001_MOESM1_ESM.pdf]
